# Supplementary material for: A phylogenetic framework of the legume genus Aeschynomene for comparative genetic analysis of the Nod-dependent and Nod-independent symbioses
Source: BMC Plant Biol. 2018 Dec 5;18:333. doi: 10.1186/s12870-018-1567-z (PMC6282307; doi:10.1186/s12870-018-1567-z)
Supplement: Supplementary file 16 — Table S4. A. americana and A. villosa accessions used for the GBS analysis, their origin and characteristics. (XLSX 16 kb) [file 12870_2018_1567_MOESM16_ESM.xlsx]

## Sheet: Feuil1
Table S3 : GenBank numbers for the sequences used in the phylogenetic analyses
Genus	Species	Accession	ITS	matK	CYP1	eiF1a	SUS	TIP1;1
Aeschynomene subgenus Aeschynomene	A. afraspera	LSTM1	FM242584*	KT821176*	MF177955 MF177956 MF177957 MF177958	KT821096* KT821097* KT821098*	KT821123* KT821124* KT821125*	MF281545 MF281546 MF281547 MF281548
	A. americana	PI544122	FM242590*	MF281585	MF177961	MF177991	MF178021	MF281551
	A. aspera	IRRI013020	FM242623*	KT821181*
	A. ciliata	IRRI013078	FM242624*	MF281598
	A. crassicaulis	LSTM13	FM242594*	KT821185*
	A. cristata	ILRI16880	KT821169*	KT821206*
	A. deamii	LSTM24	KC540625*	MF281594	KC899136*	KC899151*	KC899182*	MF281553
	A. deightonii	Lopez Poveda 204	MF281641	MF281612
	A. denticulata	IRRI13003	FM242626*	MF281599
	A. elaphroxylon	LSTM112	KC540624*	KT821187
	A. evenia ssp. evenia	CIAT22838	KC163299*	KT821190*	KC163219*	KC163232*	KC163271*	MF281555
	A. evenia ssp. serrulata	IRFL6945	KC163288*	MF281601
	A. filosa	CIAT22466	KC540623*	MF281596	KC899134*	KC899149*	KC899180*	MF281554
	A. fluitans	CPI052338	KC540622*	KT821207*
	A. fluminensis	LSTM17	FM242598*	MF281588	MF177962	MF177992	MF178022	MF281552
	A. indica 4x	PI196206	FM242601*	MF281604
	A. indica 6x (Africa)	LSTM19	KC899205*	MF281605
	A. indica 6x (Australia)	PI 257662	MG257910*	MH325202
	A. mediocris	Bingham 10508	MF281642	MF281613
	A. montevidensis	LSTM131	KC540621*	MF281590	MF177963	MF177994	MF178024	MF281556
	A. nilotica	IRRI014040	KC560767*	KT821193*
	A. paraguayensis	T.M. Pedersen 9301	MF281635	MF281591
	A. parviflora	IRFL02854	KC540620*	MF281589
	A. pfundii	LSTM54	FM242629*	KT821195*
	A. pratensis	IRRI13006	FM242630*	MF281611
	A. rostrata	600445344	MF281638*	MF281595
	A. rudis	LSTM56	FM242631*	MF281606
	A. scabra	PI296044	FM242604*	MF281607
	A. schimperi 4x	IRRI012146	FM242625*	KT821186*
	A. schimperi 4x	ILRI000659	KT821160*	KT821196*
	A. schimperi 8x	IRRI012156	FM242633*	KT821199*
	A. schimperi 8x	ILRI013814	KT821166*	KT821203*
	A. selloi	CPI104040	KC899207*	MF281610
	A. sensitiva	LSTM28	FM242607*	MF281609
	A. sp (328)	CIAT 8499	MG257911*	MH325203
	A. sp (353)	AusTCFC 84952	MG257912*	MH325204
	A. tambacoudensis	LSTM60	FM242634*	MF281597
	A. uniflora	IRRI013158	FM242635*	KT821207*	MF177959 MF177960	KT821121* KT821122*	KT821148* KT821149*	MF281549 MF281550
	A. unijuga	Jalisco 1952	MF281634	MF281587
	A. villosa	PI546550	FM242619*	MF281586
	A. virginica	LSTM63	KC560766*	MF281608
Aeschynomene subgenus Bakerophyton	A. lateritia	8384	-	MF281628
	A. pulchella	32798	MF281654	MF281627
Aeschynomene subgenus Rueppellia	A. abyssinica	ILRI13761	MF281650	MF281622	MF177977 MF177978	MF178005 MF178006	MF178036	MF281571 MF281572
	A. abyssinica	ILRI7705	MF281651	MF281623
	A.bella	ILRI18422	KC540628*	MF281624	MF177975 MF177976	MF178007 MF178008	MF178037	MF281569 MF281570
	A. heurckeana	LSTM310	MF281652	MF281625
	A. pigmaea	LSTM321	MF281653	MF281626
Aeschynomene unclassified	A. patula	CPI052332	MF281636	MF281592	MF177964	MF177993	MF178023	MF281557
	A. schindleri	P001468	MF281637	MF281593
Bryaspis	B. humularioides	Burgt 1734	MF281647	MF281619	MF177985 MF177986	MF178015 MF178016	MF178043 MF178044	MF281579 MF281580
	B. lupulina	KG369400	MF281646	MF281618	MF177983 MF177984	MF178013 MF178014	MF178041 MF178042	MF281577 MF281578
Cyclocarpa	C. stellaris	KG246518	MF281644	MF281615	MF177966 MF177967	MF177996 MF177997	MF178026 MF178027	MF281559 MF281560
Geissaspis	G. cristata		MF281648	MF281620	MF177987 MF177988	MF178017 MF178018	MF178045 MF178046	MF281581 MF281582
	G. tenella		MF281649	MF281621	MF177989 MF177990	MF178019 MF178020	MF178047 MF178048	MF281583 MF281584
Humularia	H. descampsii	ILRI16882	MF281657	MF281632	MF177971 MF177972	MF178001 MF178002	MF178032 MF178033	MF281565 MF281566
	H. kapiriensis		MF281658	MF281633	MF177973 MF177974	MF178003 MF178004	MF178034 MF178035	MF281567 MF281568
Kotschya	K. africana		MF281655	MF281630
	K. lutea		KC560762*	MF281629	MF177979 MF177980	MF178009 MF178010	MF178038 MF178039	MF281573 MF281574
	K. strigosa		MF281656	MF281631	MF177981 MF177982	MF178011 MF178012	MF178040 MF178041	MF281575 MF281576
Smithia	S. abyssinica	ILRI8360	KC560763*	MF281616	MF177968	MF177998	MF178028 MF178029	MF281561 MF281562
	S. sensitiva	ILRI23833	MF281645	MF281617	MF177969 MF177970	MF177999 MF178000	MF178030 MF178031	MF281563 MF281564
Soemmeringia	S. semperflorens	CIAT9844	MF281643	MF281614	MF177965	MF177995	MF178025	MF281558
Outgroup	Pictetia angustifolia		AF068171*	AF203579*
*: Sequences previously published in Chaintreuil et al., 2013, 2016a, 2018 and Arrighi et al., 2012, 2013, 2014 or directly retrived from GeneBank.
